# Supplementary material for: The Impact of PPARγGenetic Variants on IBD Susceptibility and IBD Disease Course
Source: Hindawi journal article supplement (doi:10.1155/2012/349469), 2012-01-01
Supplement: f1 [file 349469.f1.pdf]

**Supplemental Table 1: Oligonucleotides used as PCR primers to amplify the *NR1C3* exons.**

| Primer name | Primer sequence         | Nested PCR | Primer name | Primer sequence      |
|-------------|-------------------------|------------|-------------|----------------------|
| PPARg 1_F   | ttcaagcccagtcctttctg    | no         |             |                      |
| PPARg 1_R   | aatgaacgcgatagcaacg     | no         |             |                      |
| PPARg 3_F   | tcataaaacagcctagacagcac | no         |             |                      |
| PPARg 3_R   | cccttctggcatttcatag     | no         |             |                      |
| PPARg 4_F   | tgctgtgattacaaaccttc    | yes        | PPARg 4_Fa  | tgggggtcatagaaccacag |
| PPARg 4_R   | ggctgcagtgtgctaggatag   | yes        | PPARg 4_Ra  | gatcacttgagcccagaagc |
| PPARg 5_F   | agggacctggagatcctctg    | no         |             |                      |
| PPARg 5_R   | agatgcccaaccacagagag    | no         |             |                      |
| PPARg 6_F   | tgatggctgtgctactttgtg   | no         |             |                      |
| PPARg 6_R   | ttgtgctatctgaaaacttcc   | no         |             |                      |
| PPARg 7_F   | ctcattattaagcatcttcagc  | no         |             |                      |
| PPARg 7_R   | tcacaccgcaaacctatgac    | no         |             |                      |
| PPARg 8_F   | tcttaccattatctgcttacc   | no         |             |                      |
| PPARg 8_R   | gtgtctttataaacaatatgc   | no         |             |                      |

DNA sequences are shown in 5' to 3' direction.  
F, forward; R, reverse.
